# Supplementary material
Source: PubMed Central journal article supplement (PMC8175039)
Supplement: NIHMS1690490-supplement-Supplementary_Material.pdf [file NIHMS1690490-supplement-Supplementary_Material.pdf]

# $\alpha$ -SARS S

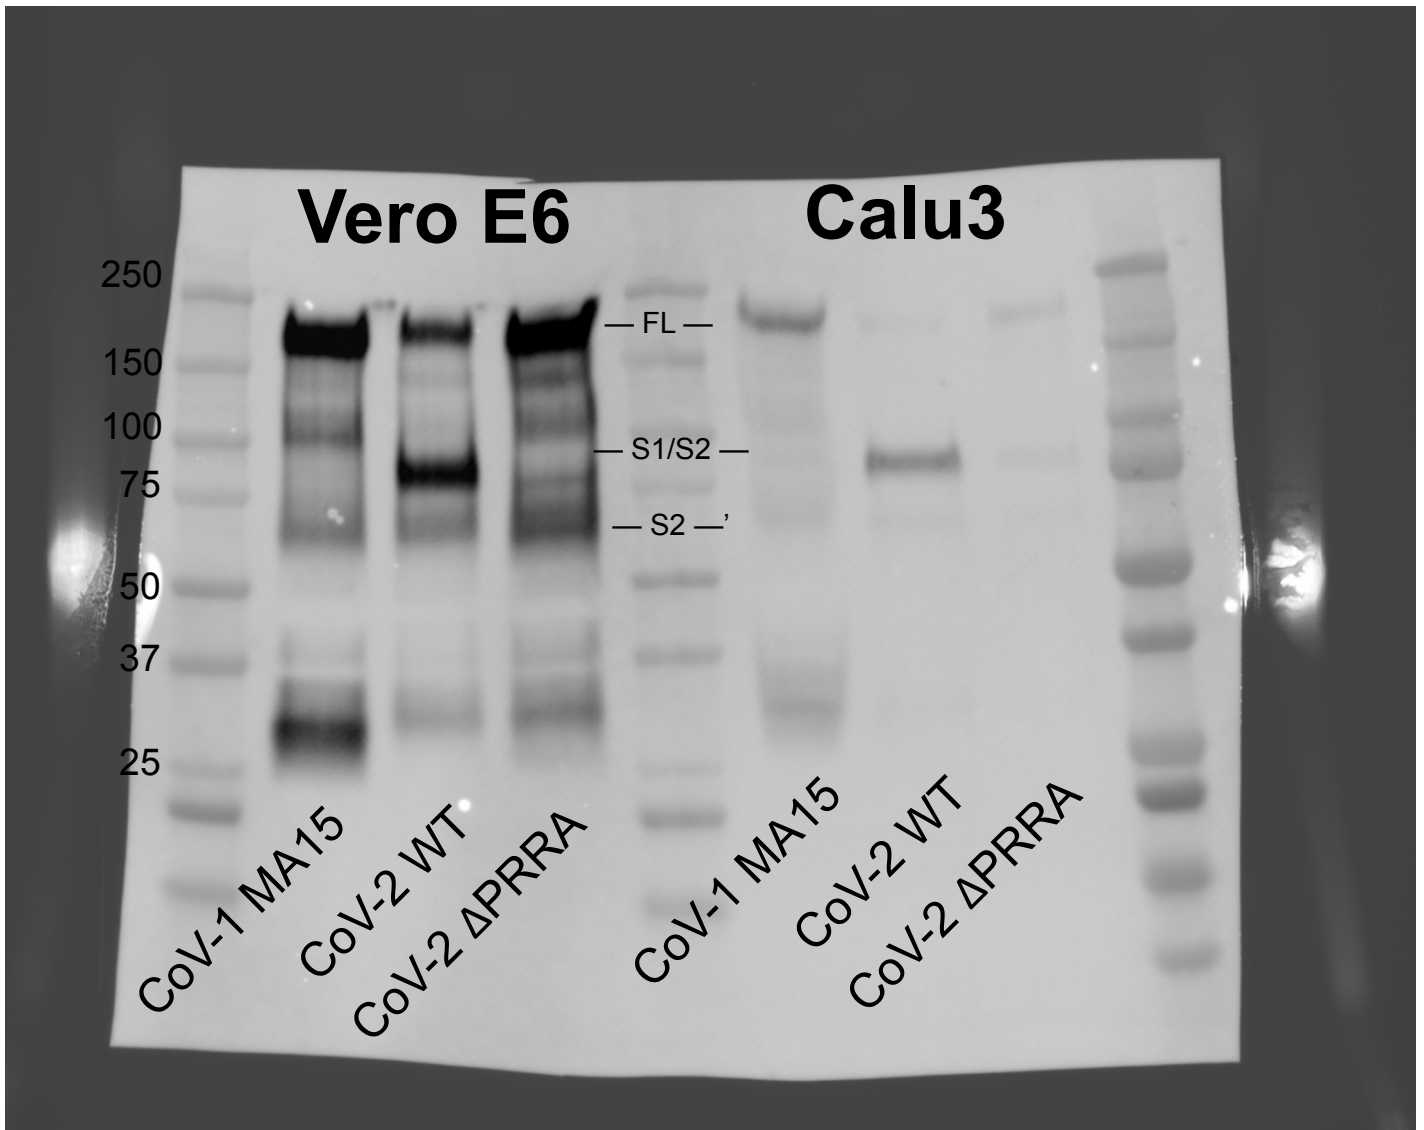

Supplementary Figure 1. Figure 1d & 1g Top Panel

# $\alpha$ -SARS N

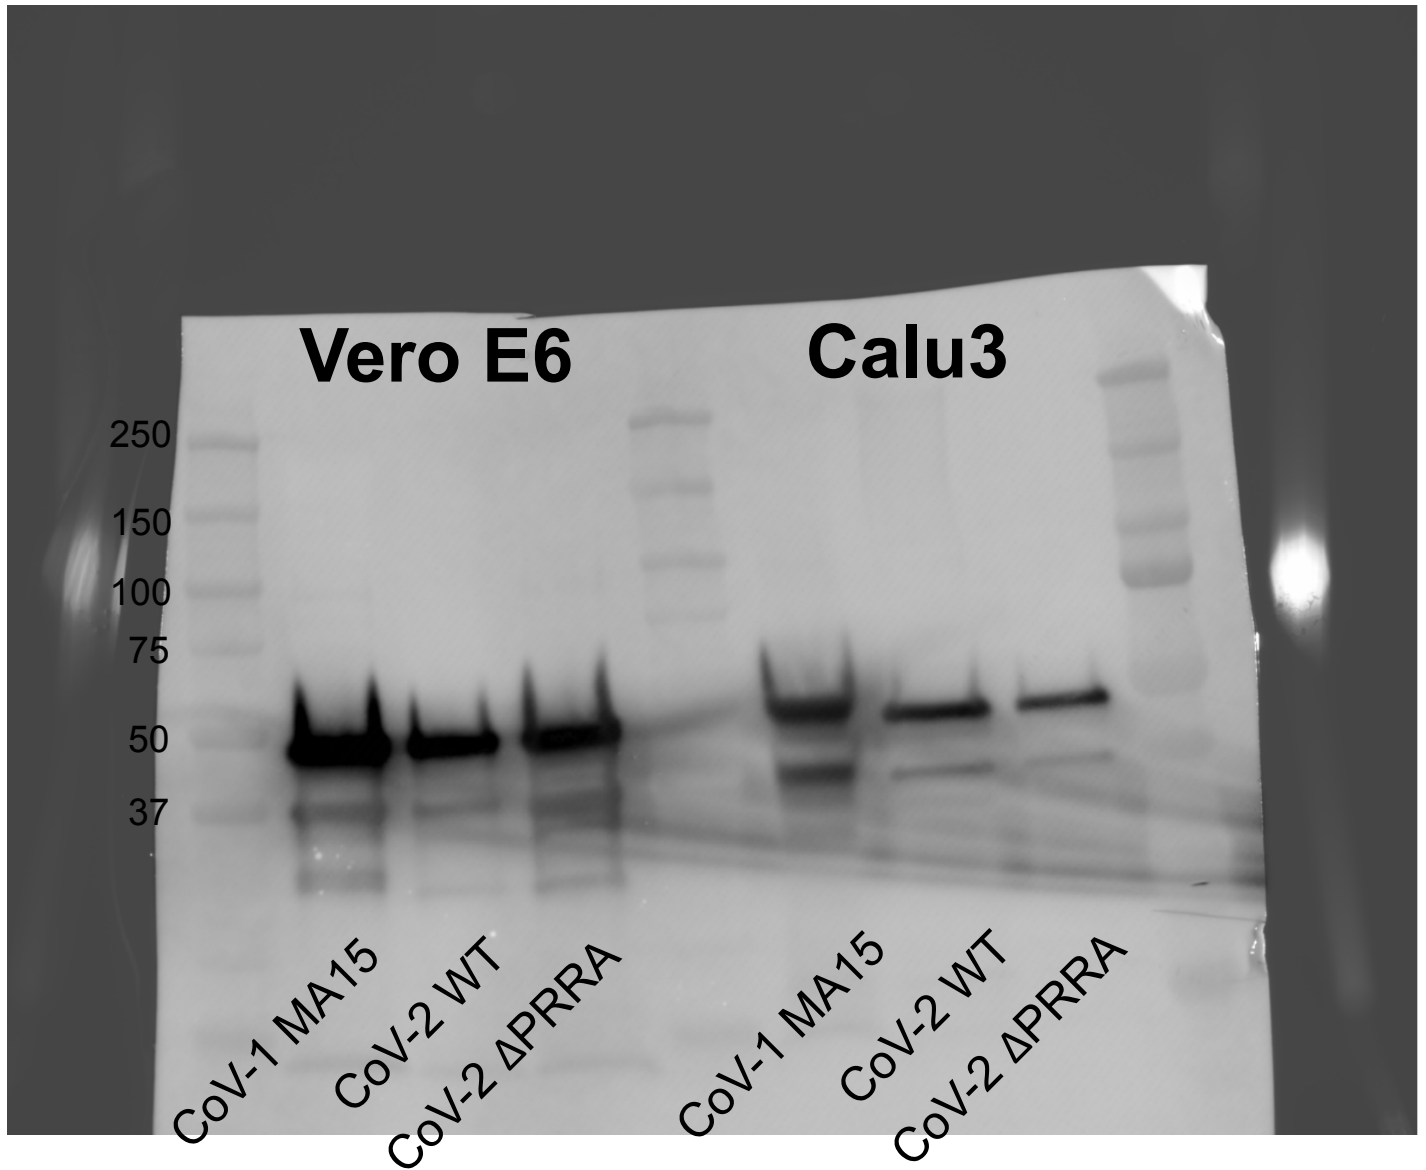

Supplementary Figure 2. Figure 1d & 1g Bottom Panel

# $\alpha$ -SARS S

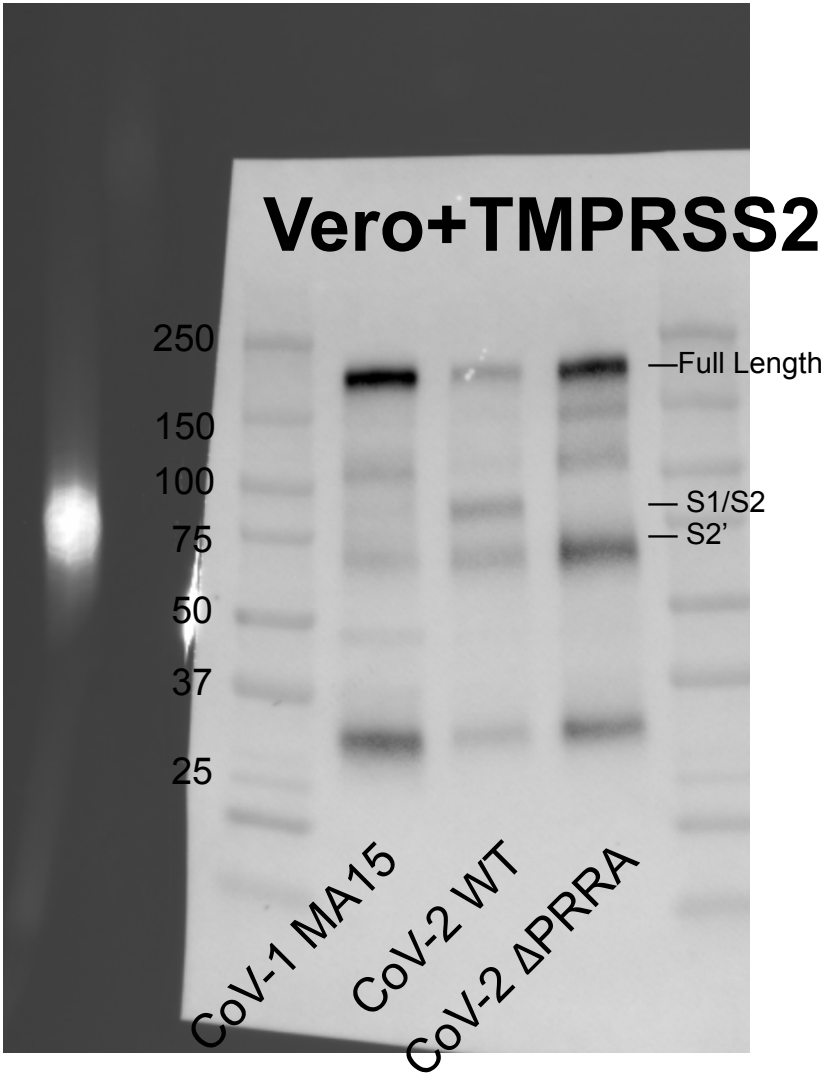

Supplementary Figure 3. Figure 1j. Top Panel

# $\alpha$ -SARS N

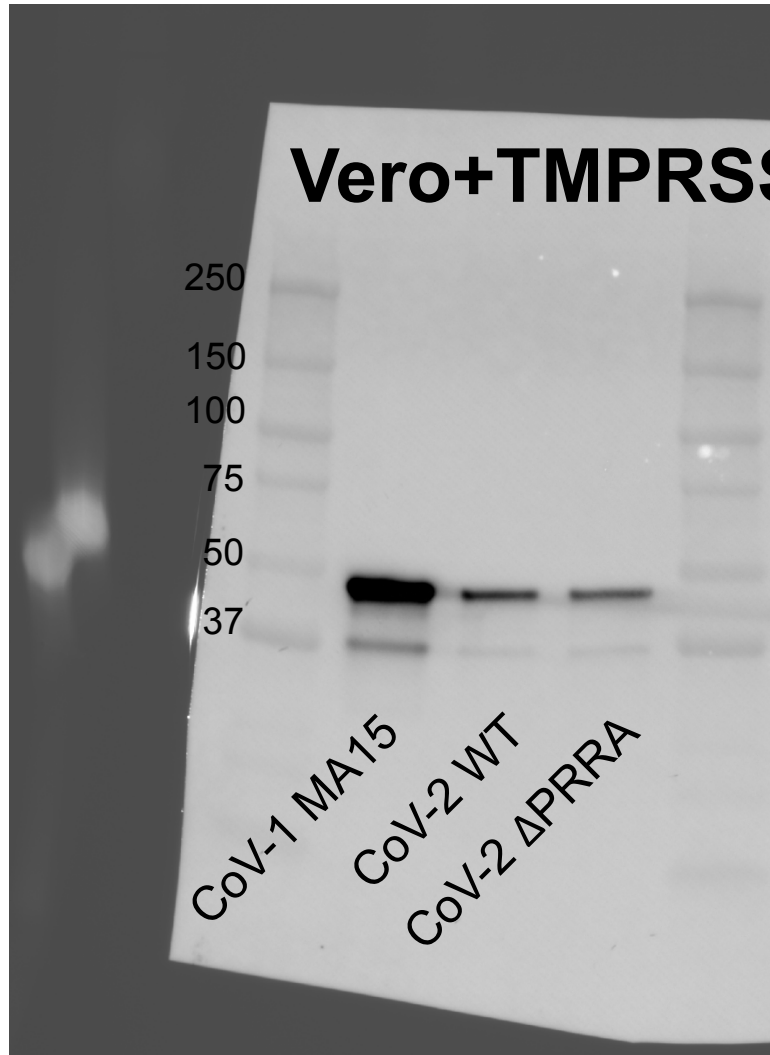

**Supplementary Figure 4. Figure 1j. Bottom Panel**
